# Supplementary material for: Magnetic iron oxide nanoparticles for the collection and direct measurement of adsorbed alpha-emitting radionuclides from environmental waters by liquid scintillation analysis
Source: Royal Society of Chemistry journal article supplement (doi:10.1039/c7ay00247e), 2017-01-01
Supplement: c7ay00247e1.pdf [file c7ay00247e1.pdf]

## Electronic Supplementary Information

### Magnetic iron oxide nanoparticles for the collection and direct measurement of adsorbed alpha-emitting radionuclides from environmental waters by liquid scintillation analysis

Matthew J. O'Hara\*, R. Shane Addleman

Pacific Northwest National Laboratory, 902 Battelle Blvd., PO Box 999, Richland, WA 99352

\* Corresponding Author e-mail: [matthew.ohara@pnl.gov](mailto:matthew.ohara@pnl.gov)

Table S1. MNP-based analyte collection and analysis method outline, presented as a supplement to Fig. S1.

|                                    | Step           | Description                                                             | Footnote |
|------------------------------------|----------------|-------------------------------------------------------------------------|----------|
| <b>Analyte concentration</b>       | A              | Obtain sample aliquot                                                   |          |
|                                    | B              | Analyte sorption onto MNPs                                              | a        |
|                                    | C              | Magnetic collection of analyte-bound MNPs                               | b        |
| <b>LS analysis: MNP suspension</b> | D <sub>1</sub> | Decant sample, leaving small volume behind                              | c        |
|                                    | E <sub>1</sub> | Prepare MNP concentrate by resuspending MNPs in solution                | d        |
|                                    | F <sub>1</sub> | Aliquot MNP concentrate into LS cocktail; perform LS analysis           | e        |
| <b>LS analysis: Dissolved MNPs</b> | D <sub>2</sub> | Decant sample                                                           |          |
|                                    | E <sub>2</sub> | Dissolve MNPs in acid                                                   | f        |
|                                    | F <sub>2</sub> | Aliquot dissolved MNP concentrate into LS cocktail; perform LS analysis |          |

- MNPs added as a fully suspended concentrate in DI water
- Placement location of magnet(s) for efficient MNP collection will depend on sample container dimensions
- Alternatively, decant all sample volume and add known volume of water or dilute acid
- Requires sonication and vigorous shaking to disrupt particle aggregation that formed during magnetic collection
- Abide by MNP/cocktail suspension limits outlined in Section 4.1
- Add a few drops strong HCl to dissolve MNPs; evaporate to incipient dryness; bring to known volume in water or dilute acid

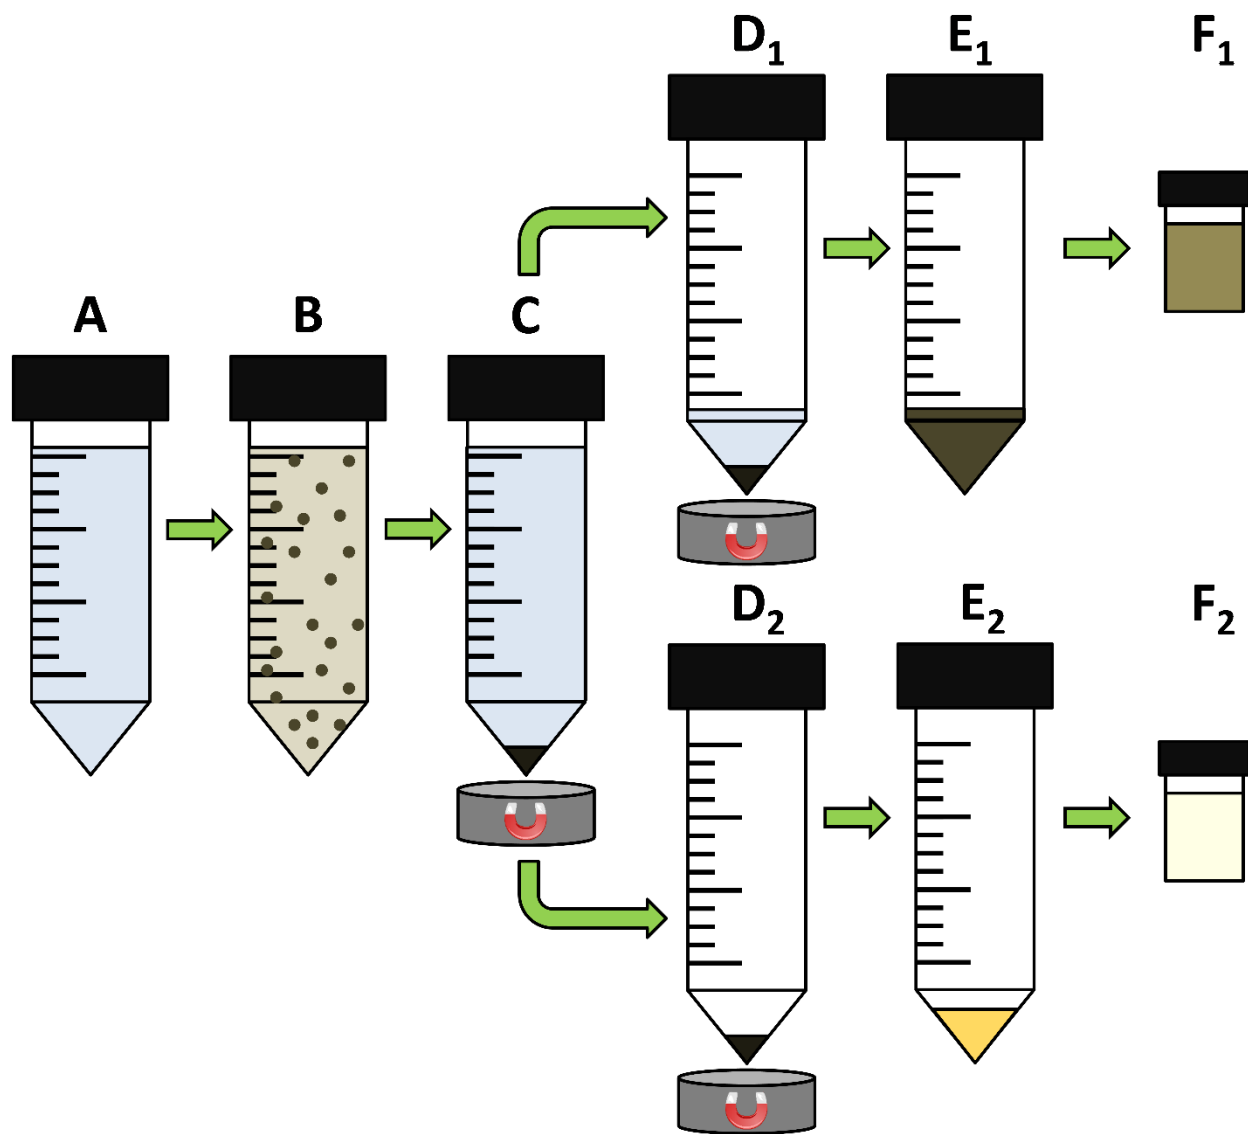

Fig. S1. MNP-based analyte collection and analysis method flow diagram. See Table S1 for description of steps.
